# Supplementary material for: Comparative understanding of peroxide quantitation assays: a case study with peptide drug product degradation
Source: Royal Society of Chemistry journal article supplement (doi:10.1039/d4ay00652f), 2024-01-01
Supplement: d4ay00652f1.pdf [file d4ay00652f1.pdf]

## **Electronic Supplementary Information (ESI)**

### **Comparative Understanding of Peroxide Quantitation Assays: A Case Study with Peptide Drug Product Degradation**

Kingshuk Dutta,\* Tao Zheng, Evan M. Hetrick

Bioproduct Research & Development, Lilly Technology Center-North, Indianapolis, IN

\*Corresponding author: [dutta\\_kingshuk@lilly.com](mailto:dutta_kingshuk@lilly.com)

**Table S1.** Example assay plate design for validation studies in water.

|          | 1               | 2     | 3     | 4               | 5     | 6     | 7               | 8     | 9     | 10              | 11    | 12    |
|----------|-----------------|-------|-------|-----------------|-------|-------|-----------------|-------|-------|-----------------|-------|-------|
| <b>A</b> | Ctrl 1.5 ppm    |       |       | N/A             |       |       | 0.0078          |       |       | 0.0156          |       |       |
| <b>B</b> | 0.031           |       |       | 0.0625          |       |       | 0.125           |       |       | 0.25            |       |       |
| <b>C</b> | 0.5             |       |       | 1               |       |       | 2               |       |       | Ref 2           |       |       |
| <b>D</b> | Ref 1           |       |       | Ref 0.5         |       |       | Ref 0.25        |       |       | Ref 0.125       |       |       |
| <b>E</b> | Ref 0.0625      |       |       | Ref 0.031       |       |       | Ref 0.0156      |       |       | Ref 0.0078      |       |       |
| <b>F</b> | Precision 0.031 |       |       |
| <b>G</b> | Precision 0.031 |       |       | N/A             |       |       | Stability 0.05  |       |       | Stability 0.05  |       |       |
| <b>H</b> | Blank           | Blank | Blank |

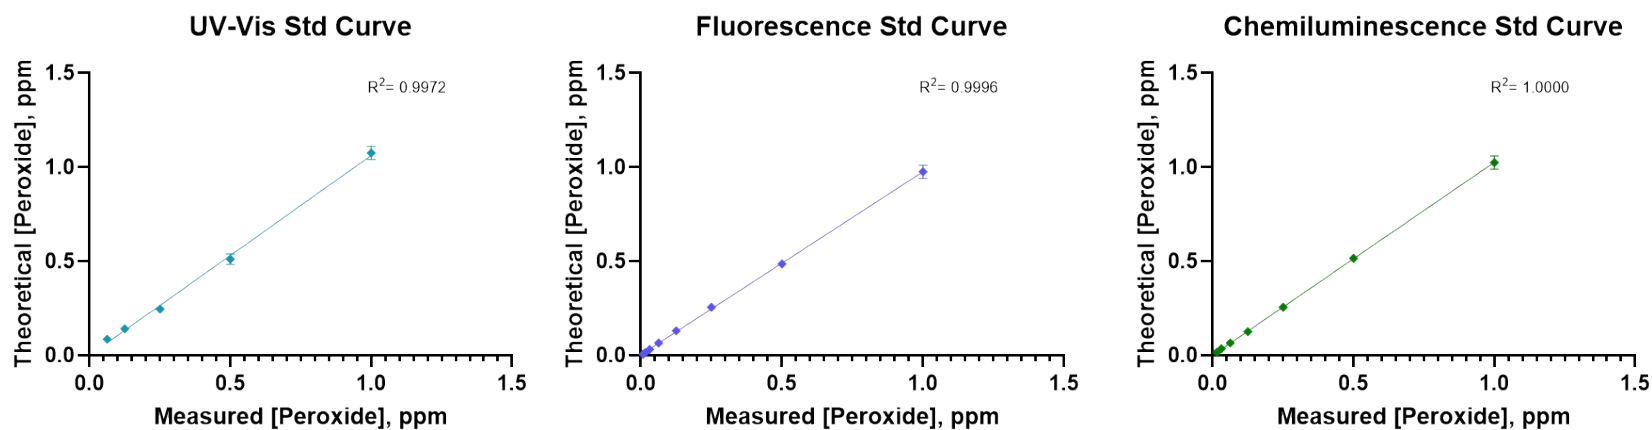

**Figure S1.** Standard curves for linearity assessments during validation studies of UV-Vis, fluorescence and chemiluminescence assays for peroxide quantification.

**Table S2.** Forced degradation data (presented in Figure 2) for peptide drug products in presence of peroxide under different degradation conditions, 5 °C-21 days, 40 °C-7 days, and 40 °C-21 days.

| Peptide DPs<br>21 D | 5 °C | 5 °C – 1 ppm | 5 °C – 10 ppm | Peptide DPs<br>7 D | 40 °C | 40 °C – 1 ppm | 40 °C – 10 ppm | Peptide DPs<br>21 D | 40 °C | 40 °C – 1 ppm | 40 °C – 10 ppm |
|---------------------|------|--------------|---------------|--------------------|-------|---------------|----------------|---------------------|-------|---------------|----------------|
| Insulin             | 96.4 | 96.4         | 96.4          | Insulin            | 95.6  | 95.2          | 92.6           | Insulin             | 92.1  | 92.0          | 84.9           |
| Peptide 1           | 96.9 | 96.3         | 96.4          | Peptide 1          | 96.8  | 96.1          | 95.9           | Peptide 1           | 92.2  | 91.2          | 87.8           |
| Peptide 2           | 95.8 | 95.7         | 94.9          | Peptide 2          | 94.8  | 94.8          | 91.2           | Peptide 2           | 85.6  | 84.3          | 73.1           |
| Peptide 3           | 92.9 | 92.3         | 90.2          | Peptide 3          | 92.7  | 91.9          | 91.0           | Peptide 3           | 88.3  | 85.8          | 80.9           |
| GLP-1(7-36)         | 80.0 | 80.1         | 79.5          | GLP-1(7-36)        | 80.0  | 78.2          | 78.4           | GLP-1(7-36)         | 77.5  | 74.9          | 73.1           |
| Peptide 4           | 89.8 | 89.6         | 88.2          | Peptide 4          | 88.7  | 83.5          | 71.6           | Peptide 4           | 83.9  | 77.3          | 55.4           |
| Peptide 5           | 98.9 | 98.1         | 98.1          | Peptide 5          | 89.8  | 80.2          | 41.6           | Peptide 5           | 89.9  | 50.7          | 17.1           |
| Peptide 6           | 92.0 | 86.7         | 67.5          | Peptide 6          | 86.9  | 77.3          | 29.6           | Peptide 6           | 87.4  | 64.2          | 19.1           |
| Peptide 7           | 92.3 | 85.6         | 45.1          | Peptide 7          | 70.8  | 55.7          | 6.4            | Peptide 7           | 41.2  | 27.9          | 0.2            |
| Peptide 8           | 87.1 | 81.7         | 46.6          | Peptide 8          | 38.8  | 30.3          | 3.0            | Peptide 8           | 51.9  | 34.3          | 0.1            |

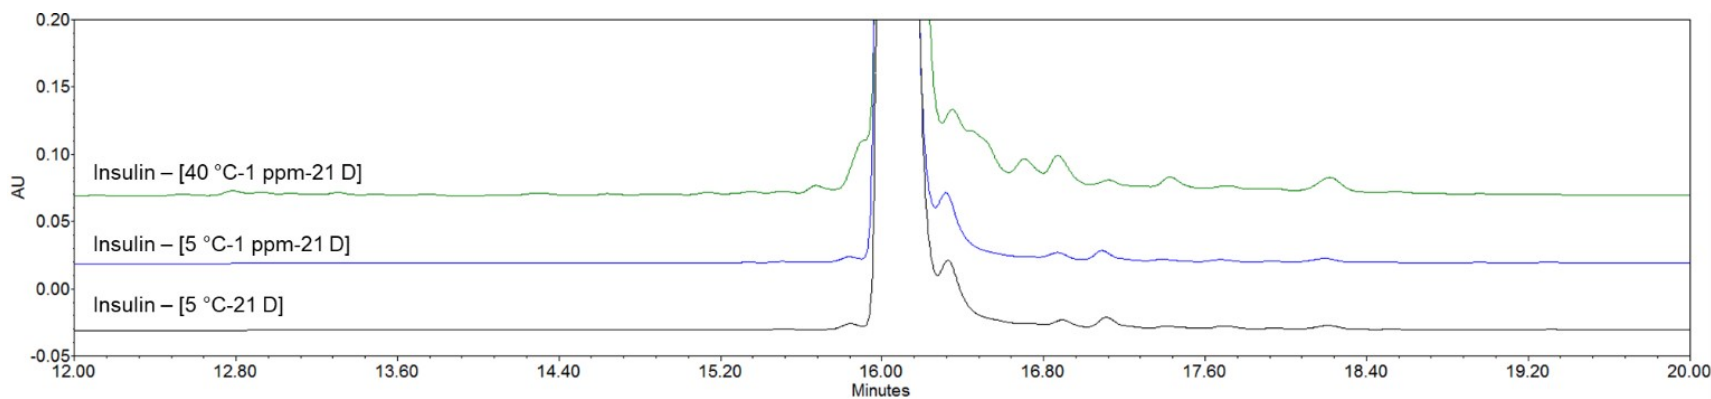

**Figure S2.** RP-HPLC chromatograms showing low degradation for Insulin in presence of 1 ppm peroxide.

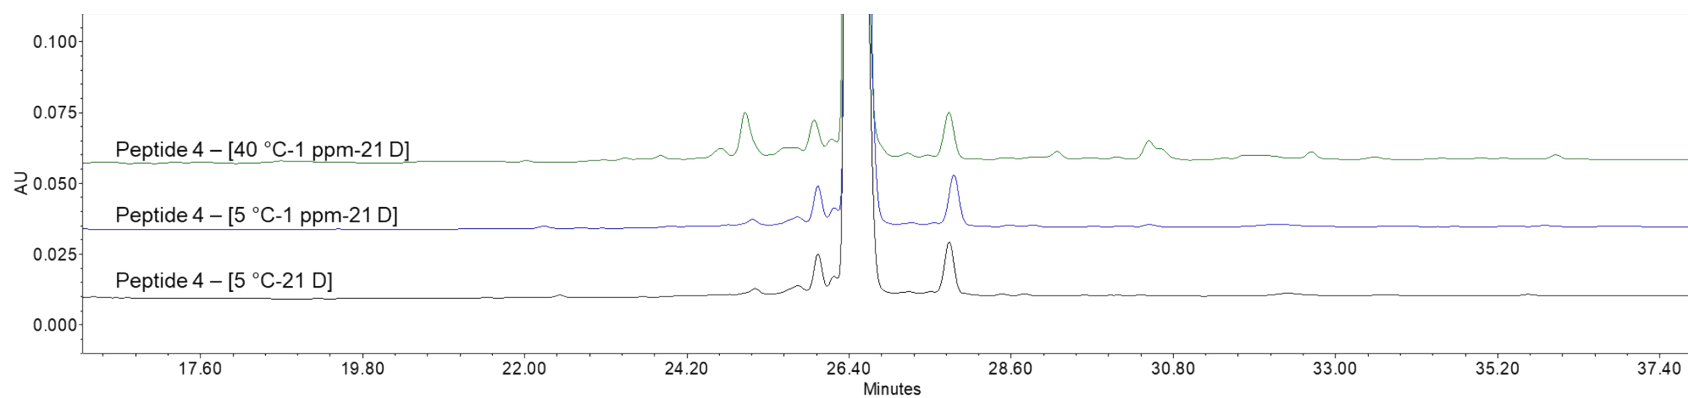

**Figure S3.** RP-HPLC chromatograms showing moderate degradation for Peptide 4 in presence of 1 ppm peroxide.

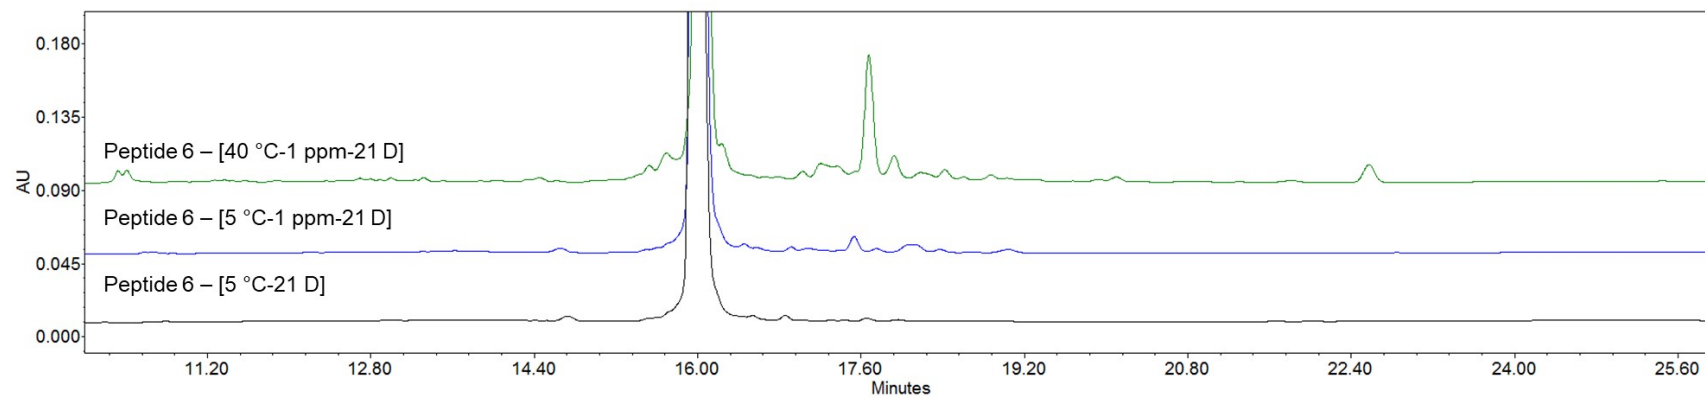

**Figure S4.** RP-HPLC chromatograms showing high degradation for Peptide 6 in presence of 1 ppm peroxide.

**Table S3.** Peroxide quantitation data for peptide drug products under different degradation conditions, 5 °C-21 days, 40 °C-7 days, and 40 °C-21 days: top three plots are for Fe-XO (UV-Vis) assay, and bottom three are for HyPerBlu (luminescence) assay, respectively (ND=not detected).

| Peptide DPs<br>21 D (UV-Vis) | 5 °C | 5 °C – 1 ppm | 5 °C – 10 ppm | Peptide DPs<br>7 D (UV-Vis) | 40 °C | 40 °C – 1 ppm | 40 °C – 10 ppm | Peptide DPs<br>21 D (UV-Vis) | 40 °C | 40 °C – 1 ppm | 40 °C – 10 ppm |
|------------------------------|------|--------------|---------------|-----------------------------|-------|---------------|----------------|------------------------------|-------|---------------|----------------|
| Insulin                      | 0.08 | 0.80         | 8.01          | Insulin                     | 0.08  | 0.78          | 4.66           | Insulin                      | 0.08  | 1.20          | 12.59          |
| Peptide 1                    | 0.12 | 0.74         | 8.06          | Peptide 1                   | 0.12  | 0.83          | 4.69           | Peptide 1                    | 0.14  | 1.28          | 13.07          |
| Peptide 2                    | 0.10 | 0.81         | 8.07          | Peptide 2                   | 0.11  | 0.90          | 4.72           | Peptide 2                    | 0.16  | 1.37          | 12.56          |
| Peptide 3                    | 0.12 | 0.96         | 7.97          | Peptide 3                   | 0.12  | 0.90          | 4.77           | Peptide 3                    | 0.15  | 1.33          | 11.56          |
| GLP-1(7-36)                  | 0.1  | 0.93         | 8.4           | GLP-1(7-36)                 | 0.09  | 0.83          | 4.68           | GLP-1(7-36)                  | 0.14  | 1.08          | 10.78          |
| Peptide 4                    | 0.11 | 0.94         | 7.98          | Peptide 4                   | 0.11  | 0.72          | 4.78           | Peptide 4                    | 0.15  | 0.63          | 6.38           |
| Peptide 5                    | 0.11 | 0.95         | 8.19          | Peptide 5                   | 0.09  | 0.83          | 4.83           | Peptide 5                    | 0.08  | 1.30          | 13.12          |
| Peptide 6                    | 0.08 | 0.71         | 7.08          | Peptide 6                   | 0.09  | 0.31          | 4.59           | Peptide 6                    | 0.08  | 0.21          | 5.28           |
| Peptide 7                    | 0.09 | 0.67         | 6.63          | Peptide 7                   | 0.08  | 0.34          | 4.60           | Peptide 7                    | 0.08  | 0.12          | 8.62           |
| Peptide 8                    | 0.08 | 0.71         | 6.93          | Peptide 8                   | 0.08  | 0.36          | 4.66           | Peptide 8                    | 0.08  | 0.13          | 8.88           |

  

| Peptide DPs<br>21 D (Lumi) | 5 °C | 5 °C – 1 ppm | 5 °C – 10 ppm | Peptide DPs<br>7 D (Lumi) | 40 °C | 40 °C – 1 ppm | 40 °C – 10 ppm | Peptide DPs<br>21 D (Lumi) | 40 °C | 40 °C – 1 ppm | 40 °C – 10 ppm |
|----------------------------|------|--------------|---------------|---------------------------|-------|---------------|----------------|----------------------------|-------|---------------|----------------|
| Insulin                    | ND   | 0.73         | 3.15          | Insulin                   | ND    | 0.74          | 3.34           | Insulin                    | 0.01  | 1.21          | 5.85           |
| Peptide 1                  | 0.06 | 1.02         | 3.95          | Peptide 1                 | 0.07  | 1.15          | 4.42           | Peptide 1                  | 0.06  | 1.68          | 6.64           |
| Peptide 2                  | 0.02 | 1.13         | 3.01          | Peptide 2                 | 0.05  | 1.10          | 3.59           | Peptide 2                  | 0.14  | 1.68          | 5.49           |
| Peptide 3                  | ND   | 0.95         | 3.06          | Peptide 3                 | 0.01  | 0.88          | 3.23           | Peptide 3                  | 0.02  | 1.33          | 5.09           |
| GLP-1(7-36)                | ND   | 0.74         | 2.65          | GLP-1(7-36)               | 0.03  | 0.67          | 2.91           | GLP-1(7-36)                | 0.05  | 1.04          | 4.75           |
| Peptide 4                  | 0.09 | 3.32         | 3.91          | Peptide 4                 | 0.07  | 2.29          | 3.00           | Peptide 4                  | 0.08  | 2.18          | 3.60           |
| Peptide 5                  | 0.02 | 1.22         | 3.64          | Peptide 5                 | ND    | 0.39          | 3.02           | Peptide 5                  | ND    | 0.60          | 4.26           |
| Peptide 6                  | ND   | 0.69         | 2.69          | Peptide 6                 | ND    | 0.28          | 2.01           | Peptide 6                  | 0.01  | 0.20          | 2.27           |
| Peptide 7                  | ND   | 0.70         | 2.23          | Peptide 7                 | ND    | 0.36          | 2.30           | Peptide 7                  | ND    | 0.08          | 3.76           |
| Peptide 8                  | ND   | 0.62         | 2.33          | Peptide 8                 | ND    | 0.33          | 2.25           | Peptide 8                  | ND    | 0.09          | 3.87           |
